# Supplementary material
Source: publisher figshare collection journal article supplement (https://gsajournals.figshare.com/ndownloader/files/25040495)
Supplement: Supplementary file 1 [file 25040495]

Figure S1 – average VST value calculated between the two California populations for every scaffold of the reference genome. The red line indicates Scaffold 100. Note the VST values increasing after the red line. Scaffolds in reference genomes are ordered by size, largest = lowest number, smallest scaffold =higher number.

Figure S2 – VST values of all 250 bp windows across the whole genome (Scaffolds 1-1550). Note the values of VST increasing as the scaffolds get smaller (Smaller scaffolds = higher scaffold numbers >100). Scaffolds 1-100 were excluded from subsequent analyses, they represent only ~54.73% of the genome.

Figure S3 Principal Coordinates Analysis of the top 1% copy number variants for *Suillus brevipes* individuals from the coastal (full black) and montane (empty white) populations in California.

Figure S4 - Cluster analysis showing *Suillus brevipes* individual similarity based on the number of gene copies estimated across their genome in 250 pb windows. ‘C’ stands for coastal individual, and ‘M’ stands for montane individual. This clustering analysis is in contrast with the Neighbor-Joining tree found in Branco et al (2015) where the SNP-based analysis showed a very clear distinction between the coastal and mountain populations of *Suillus brevipes* in California.

Figure S5 Principal Coordinates Analysis of only the gene ‘absences’ (with at least one instance of a ‘0’ copy number estimate) for *Suillus brevipes* individuals from a coastal (full black) and montane (empty white) populations in California.

Figure S6 Principal Coordinates Analysis of only the gene ‘gains’ (with at least one instance of a ‘>2’ copy number estimate) for *Suillus brevipes* individuals from a coastal (full black) and montane (empty white) populations in California.

Table S1 – Gene Ontology terms found in the Cytoscape Cluego analysis of the sites with the top 1% VST values.

| GOID | GOTerm | Ontology Source | Term PValue | Term PValue Corrected with Bonferroni step down | Group PValue | Group PValue Corrected with Bonferroni step down | GOLevels | GOGroups | % Associated Genes | Nr. Genes | Associated Genes Found |
| --- | --- | --- | --- | --- | --- | --- | --- | --- | --- | --- | --- |
| GO:0019787 | ubiquitin-like protein transferase activity | GO_MolecularFunction-Custom_02.02.2016_08h44 | 0.01 | 0.01 | 0.03 | 0.03 | [3] | Group0 | 7.14 | 3.00 | [827358, 854050, 949688] |
| GO:0051246 | regulation of protein metabolic process | GO_BiologicalProcess-Custom_02.02.2016_08h44 | 0.01 | 0.02 | 0.03 | 0.03 | [4, 5] | Group0 | 7.32 | 3.00 | [827358, 854050, 949688] |
| GO:0043687 | post-translational protein modification | GO_BiologicalProcess-Custom_02.02.2016_08h44 | 0.00 | 0.01 | 0.03 | 0.03 | [6, 7] | Group0 | 8.82 | 3.00 | [827358, 854050, 949688] |

Table S2 – Result of the Fisher’s exact test for 83 salt-tolerance related genes.

| gene | Protein Id | Location | Losses (F-stat) | Gains (F-stat) | Fisher test losses | Fisher test gains | Annotations |
| --- | --- | --- | --- | --- | --- | --- | --- |
| 1 | 1327023 | scaffold_316:1,498-3,154 (-) | 0.85910685 | 0.771003412 | 1 | 1 | TCDB:2.A.47.2.2 KOG:KOG1281 IPRF:ipr004331 IPRF:ipr008998 PFD:pf03105 |
| 2 | 775441 | scaffold_36:278,067-278,862 (-) | 0.85910685 | 0.771003412 | 1 | 1 | GO:0003824 TCDB:3.B.1.1.1 KOG:KOG0369 IPRF:ipr000891 IPRF:ipr003379 PFD:pf02436 |
| 3 | 831346 | scaffold_41:124,847-126,428 (+) | 0.748668167 | 0.727449473 | 1 | 1 | TCDB:3.A.16.1.1 KOG:KOG0858 MERCO:N08.001 IPRF:ipr007599 PFD:pf04511 |
| 4 | 742405 | scaffold_134:8,786-9,286 (-) | 1 | 0.819331059 | 1 | 1 | KOG:KOG1307 |
| 5 | 1841321 | scaffold_126:50,580-52,210 (-) | 0.789726173 | 0.748668167 | 0.6169 | 1 | GO:0006885 GO:0015299 GO:0016021 TCDB:2.A.36.4.2 KOG:KOG4505 IPRF:ipr006153 PFD:pf00999 |
| 6 | 96851 | scaffold_12:396,669-397,357 (-) | 0.711230738 | 0.711230738 | 1 | 1 | TCDB:3.D.1.6.2 |
| 7 | 336427 | scaffold_34:261,919-262,787 (+) | 0.702388939 | 0.771003412 | 1 | 1 | TCDB:3.D.1.6.2 KOG:KOG3456 |
| 8 | 718119 | scaffold_12:78,539-80,560 (-) | 0.884568246 | 0.789726173 | 1 | 1 | GO:0003676 KOG:KOG3108 IPRF:ipr004365 IPRF:ipr016027 PFD:pf01336 |
| 9 | 778860 | scaffold_63:166,531-167,732 (-) | 0.884568246 | 0.789726173 | 0.5077 | 1 | TCDB:3.D.1.6.2 KEGGEC:ec:1.6.5.3 |
| 10 | 790814 | scaffold_5:384,225-387,413 (+) | 0.85910685 | 0.771003412 | 0.5077 | 1 | GO:0016021 KOG:KOG2399 IPRF:ipr004837 PFD:pf01699 |
| 11 | 811415 | scaffold_203:20,875-21,560 (+) | 0.85910685 | 0.771003412 | 1 | 1 | TCDB:3.D.1.6.1 |
| 12 | 826967 | scaffold_13:313,685-316,039 (+) | 0.85910685 | 0.771003412 | 1 | 1 | TCDB:2.A.18.6.2 KOG:KOG1305 IPRF:ipr013057 PFD:pf01490 |
| 13 | 829710 | scaffold_31:159,960-160,490 (-) | 0.85910685 | 0.771003412 | 1 | 1 | TCDB:3.D.1.6.3 |
| 14 | 833663 | scaffold_73:133,180-133,842 (-) | 0.85910685 | 0.933049167 | 1 | 0.502 | TCDB:3.D.1.6.2 |
| 15 | 878641 | scaffold_171:38,698-39,273 (-) | 0.85910685 | 0.771003412 | 1 | 1 | TCDB:3.D.1.6.1 |
| 16 | 307353 | scaffold_3:567,238-569,944 (+) | 0.711230738 | 0.711230738 | 1 | 1 | GO:0016874 TCDB:3.B.1.1.2 KOG:KOG0540 KEGGEC:ec:6.4.1.3 IPRF:ipr000022 IPRF:ipr011762 IPRF:ipr011763 PFD:pf01039 |
| 17 | 1872500 | scaffold_316:82-1,624 (-) | 0.748668167 | 0.727449473 | 1 | 1 | GO:0015137 GO:0015746 GO:0016021 TCDB:2.A.47.2.2 KOG:KOG1281 IPRF:ipr004680 PFD:pf03600 |
| 18 | 831656 | scaffold_45:206,467-209,127 (+) | 0.748668167 | 0.727449473 | 1 | 1 | GO:0001882 GO:0005415 GO:0006810 GO:0016020 TCDB:2.A.41.2.7 KOG:KOG3747 IPRF:ipr002668 IPRF:ipr008276 IPRF:ipr011642 IPRF:ipr011657 PFD:pf01773 PFD:pf07662 PFD:pf07670 |
| 19 | 307297 | scaffold_3:554,171-555,390 (+) | 0.789726173 | 0.748668167 | 1 | 1 | TCDB:3.D.1.6.2 KOG:KOG3300 IPRF:ipr009346 PFD:pf06212 |
| 20 | 1410728 | scaffold_440:1,949-3,025 (-) | 0.789726173 | 0.748668167 | 1 | 1 | GO:0003676 KOG:KOG3108 IPRF:ipr004365 IPRF:ipr014892 IPRF:ipr016027 PFD:pf01336 PFD:pf08784 |
| 21 | 1755522 | scaffold_273:13,269-16,498 (-) | 0.884568246 | 0.789726173 | 1 | 1 | GO:0005215 GO:0006810 GO:0016020 TCDB:2.A.21.6.1 KOG:KOG2348 IPRF:ipr001734 PFD:pf00474 |
| 22 | 716415 | scaffold_11:289,913-292,390 (-) | 0.933049167 | 0.85910685 | 0.5077 | 1 | GO:0005215 GO:0006810 GO:0016020 TCDB:2.A.21.6.1 KOG:KOG2348 IPRF:ipr001734 PFD:pf00474 |
| 23 | 1774513 | scaffold_111:57,199-60,770 (-) | 0.711230738 | 0.711230738 | 0.502 | 1 | GO:0005215 GO:0006810 GO:0016020 TCDB:2.A.21.6.1 KOG:KOG2348 IPRF:ipr001734 PFD:pf00474 |
| 24 | 733504 | scaffold_72:159,356-159,824 (+) | 0.590334471 | 0.555930966 | 1 | 0.375 | TCDB:3.A.2.2.4 KOG:KOG1772 KEGGEC:ec:3.6.3.14 IPRF:ipr005124 PFD:pf03179 |
| 25 | 744658 | scaffold_156:77,990-78,395 (-) | 0.711230738 | 0.711230738 | 1 | 1 | TCDB:3.D.1.6.2 KOG:KOG3446 IPRF:ipr007741 IPRF:ipr016464 PFD:pf05047 |
| 26 | 788409 | scaffold_1:294,801-295,564 (-) | 0.748668167 | 0.727449473 | 1 | 1 | GO:0006118 GO:0016651 TCDB:3.D.1.6.2 KOG:KOG3389 IPRF:ipr006885 PFD:pf04800 |
| 27 | 788692 | scaffold_1:763,236-767,209 (+) | 0.85910685 | 0.771003412 | 1 | 1 | GO:0016021 TCDB:2.A.19.7.1 KOG:KOG1397 IPRF:ipr004837 IPRF:ipr005185 PFD:pf01699 PFD:pf03733 |
| 28 | 789034 | scaffold_2:265,838-266,776 (+) | 0.711230738 | 0.711230738 | 1 | 1 | TCDB:3.D.1.6.1 KOG:KOG3426 IPRF:ipr008011 PFD:pf05347 |
| 29 | 797645 | scaffold_25:339,505-340,919 (-) | 0.590334471 | 0.933049167 | 1 | 1 | GO:0003676 KOG:KOG3108 IPRF:ipr004365 IPRF:ipr014646 IPRF:ipr014892 IPRF:ipr016027 PFD:pf01336 PFD:pf08784 |
| 30 | 804897 | scaffold_73:130,384-131,389 (+) | 0.711230738 | 0.711230738 | 0.1904 | 1 | TCDB:3.D.1.6.2 KOG:KOG3458 IPRF:ipr010625 IPRF:ipr016680 PFD:pf06747 |
| 31 | 825907 | scaffold_6:317,702-318,357 (-) | 0.748668167 | 0.727449473 | 1 | 5.077 | TCDB:3.D.1.6.2 KOG:KOG4009 KEGGEC:ec:1.6.5.3 |
| 32 | 827416 | scaffold_14:64,000-66,925 (-) | 0.789726173 | 0.884568246 | 1 | 1 | GO:0005215 GO:0006810 GO:0016020 TCDB:2.A.21.6.1 KOG:KOG2348 IPRF:ipr001734 PFD:pf00474 |
| 33 | 834322 | scaffold_76:118,245-120,129 (+) | 0.660997362 | 0.688083478 | 1 | 1 | GO:0016020 TCDB:1.A.6.1.8 KOG:KOG3839 IPRF:ipr005052 IPRF:ipr008985 PFD:pf03388 |
| 34 | 951932 | scaffold_30:28,497-29,464 (+) | 1 | 0.834857601 | 1 | 1 | TCDB:3.D.1.6.2 KOG:KOG3466 IPRF:ipr008011 PFD:pf05347 |
| 35 | 1095265 | scaffold_13:296,219-298,942 (-) | 0.590334471 | 0.555930966 | 0.2615 | 0.375 | GO:0006885 GO:0015299 GO:0016021 TCDB:2.A.36.4.1 KOG:KOG4505 IPRF:ipr006153 PFD:pf00999, *protein identified in Branco et al 2015 |
| 36 | 789203 | scaffold_2:497,584-500,019 (+) | 0.623833043 | 0.727449473 | 1 | 1 | GO:0006814 GO:0006885 GO:0015299 GO:0015385 GO:0016021 TCDB:2.A.36.1.12 KOG:KOG1965 IPRF:ipr004709 IPRF:ipr006153 PFD:pf00999 |
| 37 | 855910 | scaffold_36:78,800-82,973 (+) | 0.590334471 | 0.456801005 | 0.4 | 0.1385 | GO:0006812 GO:0006813 GO:0008324 GO:0015079 GO:0016021 TCDB:2.A.38.2.5 KOG:KOG1341 IPRF:ipr003445 IPRF:ipr004773 PFD:pf02386 |
| 38 | 1673499 | scaffold_31:192,343-192,773 (+) | 0.748668167 | 0.789726173 | 1 | 1 | GO:0005743 GO:0006118 GO:0016651 TCDB:3.D.1.6.1 KOG:KOG3365 IPRF:ipr006806 PFD:pf04716 |
| 39 | 717119 | scaffold_10:429,206-429,842 (+) | 0.819331059 | 0.660997362 | 0.52 | 0.4167 | GO:0006118 GO:0008137 GO:0009055 GO:0016020 TCDB:3.D.1.6.2 KOG:KOG3382 IPRF:ipr007763 PFD:pf05071 |
| 40 | 726304 | scaffold_35:122,333-124,148 (+) | 0.711230738 | 0.711230738 | 1 | 1 | GO:0006118 GO:0009055 GO:0016651 GO:0051287 TCDB:3.D.1.6.2 KOG:KOG2870 IPRF:ipr001135 IPRF:ipr010219 IPRF:ipr014029 PFD:pf00346 |
| 41 | 1847610 | scaffold_77:42,159-45,143 (+) | 0.711230738 | 0.711230738 | 1 | 1 | GO:0015992 GO:0016020 TCDB:3.A.2.2.3 KOG:KOG2189 KEGGEC:ec:3.6.3.14 IPRF:ipr002490 PFD:pf01496 |
| 42 | 824904 | scaffold_3:549,637-550,724 (+) | 0.711230738 | 0.711230738 | 1 | 1 | GO:0006118 GO:0009055 GO:0016491 GO:0016651 GO:0051536 TCDB:3.D.1.6.1 KOG:KOG3256 IPRF:ipr001450 IPRF:ipr009051 IPRF:ipr010226 PFD:pf00037 |
| 43 | 830206 | scaffold_29:267,443-268,595 (+) | 0.800608297 | 0.819331059 | 1 | 1 | GO:0006118 GO:0016491 GO:0051287 TCDB:3.D.1.6.2 KOG:KOG3196 IPRF:ipr002023 IPRF:ipr012336 PFD:pf01257 |
| 44 | 842724 | scaffold_1:521,190-523,306 (+) | 0.748668167 | 0.727449473 | 1 | 1 | GO:0006820 GO:0015301 GO:0016021 TCDB:2.A.31.3.2 KOG:KOG1172 IPRF:ipr011531 PFD:pf00955 |
| 45 | 857573 | scaffold_65:27,854-29,540 (-) | 0.819331059 | 0.748668167 | 1 | 1 | GO:0003824 GO:0005488 GO:0008152 GO:0044237 GO:0050662 TCDB:3.D.1.6.2 KOG:KOG2865 IPRF:ipr001509 IPRF:ipr016040 PFD:pf01370 |
| 46 | 880509 | scaffold_262:13,893-17,039 (+) | 0.85910685 | 0.771003412 | 1 | 1 | GO:0015992 GO:0016020 TCDB:3.A.2.2.3 KOG:KOG2189 KEGGEC:ec:3.6.3.14 IPRF:ipr002490 PFD:pf01496 |
| 47 | 1768229 | scaffold_43:102,190-105,677 (-) | 0.884568246 | 0.789726173 | 1 | 1 | GO:0005215 GO:0006355 GO:0006814 GO:0015137 GO:0015746 GO:0016020 GO:0016021 GO:0030528 TCDB:2.A.47.2.2 KOG:KOG1281 IPRF:ipr001898 IPRF:ipr004331 IPRF:ipr004680 IPRF:ipr008998 IPRF:ipr011075 PFD:pf03105 PFD:pf03600 |
| 48 | 1094553 | scaffold_13:259,461-261,773 (+) | 0.748668167 | 0.727449473 | 0.5077 | 1 | GO:0006885 GO:0015299 GO:0016021 TCDB:2.A.36.4.4 KOG:KOG4505 IPRF:ipr006153 PFD:pf00999 |
| 49 | 182657 | scaffold_181:12,998-14,959 (-) | 0.85910685 | 0.771003412 | 1 | 1 | GO:0009058 TCDB:2.A.38.4.5 CAZY:GT4 KOG:KOG1111 KEGGEC:ec:2.4.1.198 IPRF:ipr001296 IPRF:ipr013234 PFD:pf00534 PFD:pf08288 |
| 50 | 773907 | scaffold_34:101,618-102,617 (-) | 0.748668167 | 0.727449473 | 1 | 1 | GO:0005743 GO:0008565 GO:0015031 TCDB:3.D.1.6.2 KOG:KOG3225 IPRF:ipr003397 PFD:pf02466 |
| 51 | 802215 | scaffold_49:78,596-79,894 (-) | 0.711230738 | 0.711230738 | 1 | 1 | GO:0006120 GO:0008137 TCDB:3.D.1.6.1 KOG:KOG1687 IPRF:ipr006137 IPRF:ipr006138 PFD:pf01058 |
| 52 | 1862388 | scaffold_24:284,280-284,679 (-) | 0.85910685 | 0.771003412 | 1 | 1 | GO:0006118 GO:0008137 GO:0009055 GO:0016020 GO:0042773 GO:0051536 TCDB:3.D.1.6.2 KOG:KOG2282 IPRF:ipr000283 IPRF:ipr001041 |
| 53 | 873989 | scaffold_61:91,322-94,294 (+) | 0.819331059 | 0.87309793 | 1 | 1 | GO:0006885 GO:0015299 GO:0016021 TCDB:2.A.36.4.4 KOG:KOG4505 IPRF:ipr006153 PFD:pf00999 |
| 54 | 879260 | scaffold_204:25,523-25,958 (+) | 0.85910685 | 0.771003412 | 0.3524 | 1 | GO:0003954 GO:0005739 GO:0006118 GO:0008137 TCDB:3.D.1.6.3 KOG:KOG3468 IPRF:ipr008698 PFD:pf05676 |
| 55 | 950436 | scaffold_17:138,473-139,637 (+) | 0.789726173 | 0.748668167 | 1 | 1 | GO:0006118 GO:0006120 GO:0008137 GO:0016651 TCDB:3.D.1.6.2 KOG:KOG1713 IPRF:ipr001268 IPRF:ipr010218 PFD:pf00329 |
| 56 | 800169 | scaffold_37:111,077-112,296 (+) | 0.85910685 | 0.771003412 | 1 | 1 | GO:0016469 GO:0046961 TCDB:3.A.2.2.4 KOG:KOG1664 KEGGEC:ec:3.6.3.14 IPRF:ipr002842 PFD:pf01991 |
| 57 | 805909 | scaffold_65:53,141-54,560 (+) | 0.884568246 | 0.789726173 | 1 | 1 | GO:0016469 GO:0046961 TCDB:3.A.2.2.4 KOG:KOG2957 KEGGEC:ec:3.6.3.14 IPRF:ipr002843 IPRF:ipr016727 PFD:pf01992 |
| 58 | 855088 | scaffold_31:120,459-121,102 (+) | 0.884568246 | 0.789726173 | 0.5077 | 1 | GO:0000036 GO:0006633 GO:0031177 GO:0048037 TCDB:3.D.1.6.4 KOG:KOG1748 IPRF:ipr003231 IPRF:ipr006162 IPRF:ipr006163 IPRF:ipr009081 PFD:pf00550 |
| 59 | 856063 | scaffold_44:83,995-85,572 (+) | 0.354342131 | 0.555930966 | 0.5077 | 1 | GO:0005524 GO:0016469 GO:0016820 TCDB:3.A.2.2.4 KOG:KOG2909 KEGGEC:ec:3.6.3.14 IPRF:ipr004907 PFD:pf03223 |
| 60 | 876013 | scaffold_96:113,766-116,536 (+) | 0.711230738 | 0.711230738 | 0.2642 | 1 | GO:0006118 GO:0008137 GO:0009055 GO:0016020 GO:0016491 GO:0016651 GO:0042773 GO:0051536 TCDB:3.D.1.6.2 KOG:KOG2282 IPRF:ipr000283 IPRF:ipr001041 IPRF:ipr006656 IPRF:ipr010228 IPRF:ipr015405 PFD:pf00111 PFD:pf00384 PFD:pf09326 |
| 61 | 857037 | scaffold_63:104,922-110,455 (+) | 0.748668167 | 0.789726173 | 1 | 1 | GO:0000175 GO:0003723 GO:0003824 GO:0004736 GO:0005524 GO:0005737 GO:0006094 GO:0006396 GO:0008152 GO:0009374 GO:0016874 TCDB:3.B.1.1.1 KOG:KOG0369 KEGGEC:ec:6.4.1.1 IPRF:ipr000089 IPRF:ipr000891 IPRF:ipr003379 IPRF:ipr005479 IPRF:ipr005481 IPRF:ipr005482 IPRF:ipr005930 IPRF:ipr011053 IPRF:ipr011054 IPRF:ipr011761 IPRF:ipr011764 IPRF:ipr015848 IPRF:ipr016185 PFD:pf00289 PFD:pf00364 PFD:pf00682 PFD:pf02436 PFD:pf02785 PFD:pf02786 PFD:pf03726 |
| 62 | 711485 | scaffold_2:670,685-674,691 (-) | 0.660997362 | 0.688083478 | 1 | 1 | GO:0003824 GO:0005524 GO:0006810 GO:0006812 GO:0008152 GO:0015662 GO:0016020 GO:0016820 TCDB:3.A.3.1.7 KOG:KOG0203 IPRF:ipr001757 IPRF:ipr004014 IPRF:ipr005834 IPRF:ipr006068 IPRF:ipr006069 IPRF:ipr008250 PFD:pf00122 PFD:pf00689 PFD:pf00690 PFD:pf00702 |
| 63 | 767096 | scaffold_9:531,287-532,577 (-) | 0.660997362 | 0.688083478 | 1 | 1 | GO:0016469 GO:0042626 GO:0046961 TCDB:3.A.2.2.3 KOG:KOG1647 KEGGEC:ec:3.6.3.14 IPRF:ipr002699 PFD:pf01813 |
| 64 | 784060 | scaffold_133:83,068-84,920 (-) | 0.789726173 | 0.748668167 | 1 | 1 | GO:0006118 GO:0006120 GO:0008137 GO:0010181 GO:0016651 GO:0051287 GO:0051539 TCDB:3.D.1.6.2 KOG:KOG2658 IPRF:ipr001949 IPRF:ipr011537 IPRF:ipr011538 PFD:pf01512 |
| 65 | 798695 | scaffold_32:188,617-190,731 (-) | 0.711230738 | 0.711230738 | 1 | 1 | GO:0000221 GO:0000300 GO:0005488 GO:0005524 GO:0046961 TCDB:3.A.2.2.4 KOG:KOG2759 KEGGEC:ec:3.6.3.14 IPRF:ipr004908 IPRF:ipr016024 PFD:pf03224 |
| 66 | 798835 | scaffold_29:142,145-144,494 (-) | 0.85910685 | 0.771003412 | 1 | 1 | GO:0003676 GO:0003677 GO:0004601 GO:0005634 GO:0006118 GO:0006260 GO:0006979 GO:0020037 KOG:KOG0851 IPRF:ipr002016 IPRF:ipr004365 IPRF:ipr004591 IPRF:ipr007199 IPRF:ipr013955 IPRF:ipr016027 PFD:pf01336 PFD:pf04057 PFD:pf08646 |
| 67 | 901907 | scaffold_2:663,555-667,447 (-) | 0.711230738 | 0.711230738 | 1 | 1 | GO:0003824 GO:0005524 GO:0006810 GO:0006812 GO:0008152 GO:0015662 GO:0016020 GO:0016820 TCDB:3.A.3.1.7 KOG:KOG0203 IPRF:ipr001757 IPRF:ipr004014 IPRF:ipr005834 IPRF:ipr006068 IPRF:ipr006069 IPRF:ipr008250 PFD:pf00122 PFD:pf00689 PFD:pf00690 PFD:pf00702 |
| 68 | 774452 | scaffold_38:99,742-102,706 (-) | 0.660997362 | 0.688083478 | 1 | 1 | GO:0000166 GO:0003676 GO:0004812 GO:0004815 GO:0005524 GO:0005737 GO:0006412 GO:0006418 GO:0006422 KOG:KOG2411 KEGGEC:ec:6.1.1.12 IPRF:ipr002312 IPRF:ipr004364 IPRF:ipr004365 IPRF:ipr006195 IPRF:ipr016027 PFD:pf00152 PFD:pf01336 |
| 69 | 832884 | scaffold_62:118,542-121,076 (+) | 0.789726173 | 0.748668167 | 1 | 1 | GO:0000166 GO:0003676 GO:0004812 GO:0004824 GO:0005524 GO:0005737 GO:0006412 GO:0006418 GO:0006430 KOG:KOG1885 KEGGEC:ec:6.1.1.6 IPRF:ipr002313 IPRF:ipr004364 IPRF:ipr004365 IPRF:ipr006195 IPRF:ipr016027 PFD:pf00152 PFD:pf01336 |
| 70 | 951469 | scaffold_31:184,202-186,619 (-) | 0.67236527 | 0.590334471 | 1 | 0.3193 | GO:0000166 GO:0003676 GO:0004812 GO:0004815 GO:0005524 GO:0005737 GO:0006412 GO:0006418 GO:0006422 KOG:KOG0556 KEGGEC:ec:6.1.1.12 IPRF:ipr002312 IPRF:ipr004364 IPRF:ipr004365 IPRF:ipr004523 IPRF:ipr006195 IPRF:ipr016027 PFD:pf00152 PFD:pf01336 |
| 71 | 122428 | scaffold_154:43,282-44,714 (+) | 0.711230738 | 0.711230738 | 1 | 1 | GO:0005524 GO:0015986 GO:0016020 GO:0016021 GO:0016469 GO:0042626 GO:0046933 GO:0046961 TCDB:3.A.2.2.3 KOG:KOG0233 KEGGEC:ec:3.6.3.14 IPRF:ipr000245 IPRF:ipr002379 PFD:pf00137 |
| 72 | 724514 | scaffold_32:257,546-259,908 (+) | 0.748668167 | 0.590334471 | 1 | 1 | GO:0015078 GO:0015986 GO:0016469 GO:0046933 GO:0046961 TCDB:3.A.2.2.4 KOG:KOG1352 KEGGEC:ec:3.6.3.14 IPRF:ipr000194 IPRF:ipr000793 IPRF:ipr004100 IPRF:ipr005725 PFD:pf00006 PFD:pf00306 PFD:pf02874 |
| 73 | 751314 | scaffold_237:17,811-19,999 (-) | 1 | 0.748668167 | 1 | 1 | GO:0000166 GO:0003676 GO:0004812 GO:0004815 GO:0004816 GO:0005524 GO:0005737 GO:0006412 GO:0006418 GO:0006421 GO:0006422 KOG:KOG0555 KEGGEC:ec:6.1.1.22 IPRF:ipr002312 IPRF:ipr004364 IPRF:ipr004365 IPRF:ipr004522 IPRF:ipr006195 IPRF:ipr016027 PFD:pf00152 PFD:pf01336 |
| 74 | 775904 | scaffold_45:64,812-65,465 (+) | 1 | 0.819331059 | 1 | 1 | GO:0015986 GO:0016469 GO:0046933 GO:0046961 TCDB:3.A.2.1.3 KOG:KOG1758 KEGGEC:ec:3.6.3.14 IPRF:ipr001469 PFD:pf02823 |
| 75 | 780333 | scaffold_79:37,797-39,478 (-) | 0.590334471 | 0.660997362 | 0.6169 | 1 | GO:0000166 GO:0003676 GO:0004812 GO:0004815 GO:0004816 GO:0005524 GO:0005737 GO:0006412 GO:0006418 GO:0006421 GO:0006422 KOG:KOG0554 KEGGEC:ec:6.1.1.22 IPRF:ipr002312 IPRF:ipr004364 IPRF:ipr004365 IPRF:ipr004522 IPRF:ipr006195 IPRF:ipr016027 PFD:pf00152 PFD:pf01336 |
| 76 | 780554 | scaffold_65:70,445-71,512 (-) | 0.884568246 | 0.789726173 | 0.6254 | 1 | GO:0005524 GO:0015986 GO:0016020 GO:0016021 GO:0016469 GO:0042626 GO:0046933 GO:0046961 TCDB:3.A.2.2.3 KOG:KOG0232 KEGGEC:ec:3.6.3.14 IPRF:ipr000245 IPRF:ipr002379 IPRF:ipr011555 PFD:pf00137 |
| 77 | 795243 | scaffold_17:57,425-58,141 (+) | 1 | 0.819331059 | 0.5077 | 1 | GO:0015986 GO:0016469 GO:0046933 GO:0046961 TCDB:3.A.2.2.3 KOG:KOG3432 KEGGEC:ec:3.6.3.14 IPRF:ipr005772 IPRF:ipr008218 PFD:pf01990 |
| 78 | 795664 | scaffold_18:94,268-95,838 (-) | 0.819331059 | 0.87309793 | 0.6169 | 1 | GO:0015986 GO:0016020 GO:0016469 GO:0046933 GO:0046961 TCDB:3.A.2.1.3 KOG:KOG1531 KEGGEC:ec:3.6.3.14 IPRF:ipr000131 PFD:pf00231 |
| 79 | 796256 | scaffold_15:215,301-216,740 (+) | 0.711230738 | 0.711230738 | 0.3524 | 1 | GO:0015986 GO:0016469 GO:0046933 GO:0046961 TCDB:3.A.2.1.3 KOG:KOG3976 KEGGEC:ec:3.6.3.14 IPRF:ipr008688 PFD:pf05405 |
| 80 | 806281 | scaffold_90:118,086-120,272 (+) | 0.251331833 | 0.933049167 | 0.02268 | 1 | GO:0015078 GO:0015986 GO:0016469 GO:0016820 GO:0046933 GO:0046961 TCDB:3.A.2.1.3 KOG:KOG1353 KEGGEC:ec:3.6.3.14 IPRF:ipr000194 IPRF:ipr000793 IPRF:ipr004100 IPRF:ipr005294 PFD:pf00006 PFD:pf00306 PFD:pf02874 |
| 81 | 905238 | scaffold_240:33,151-34,154 (-) | 1 | 0.251331833 | 0.6734 | 0.125 | GO:0015986 GO:0016469 GO:0046933 GO:0046961 TCDB:3.A.2.1.3 KOG:KOG3366 KEGGEC:ec:3.6.3.14 IPRF:ipr008689 |
| 82 | 948202 | scaffold_1:920,405-921,137 (+) | 1 | 0.645657869 | 1 | 1 | GO:0015986 GO:0016469 GO:0046933 GO:0046961 TCDB:3.A.2.1.3 KOG:KOG1662 KEGGEC:ec:3.6.3.14 IPRF:ipr000711 PFD:pf00213 |
| 83 | 953363 | scaffold_59:105,769-106,691 (+) | 1 | 0.371094316 | 0.2262 | 1 | GO:0005524 GO:0015986 GO:0016020 GO:0016021 GO:0016469 GO:0042626 GO:0046933 GO:0046961 TCDB:3.A.2.2.3 KOG:KOG0232 KEGGEC:ec:3.6.3.14 IPRF:ipr000245 IPRF:ipr002379 IPRF:ipr011555 PFD:pf00137 |
| 84 | 1796986 | scaffold_290:36,722-38,495 (+) | 1 | 0.371094316 | 0.2262 | 1 | GO:0000166 GO:0006754 GO:0008553 GO:0015078 GO:0015986 GO:0016021 GO:0016469 GO:0017111 GO:0046933 GO:0046961 TCDB:3.A.2.1.3 KOG:KOG1350 KEGGEC:ec:3.6.3.14 IPRF:ipr000194 IPRF:ipr000793 IPRF:ipr003593 IPRF:ipr004100 IPRF:ipr005722 PFD:pf00006 PFD:pf00306 PFD:pf02874 |
| 85 | 766562 | scaffold_9:49,476-51,593 (+) | 0.590334471 | 1 | 0.6254 | 1 | GO:0000166 GO:0006754 GO:0008553 GO:0015078 GO:0015986 GO:0016021 GO:0016469 GO:0017111 GO:0046933 GO:0046961 TCDB:3.A.2.1.3 KOG:KOG1350 KEGGEC:ec:3.6.3.14 IPRF:ipr000194 IPRF:ipr000793 IPRF:ipr003593 IPRF:ipr004100 IPRF:ipr005722 PFD:pf00006 PFD:pf00306 PFD:pf02874 |
| 86 | 823998 | scaffold_1:84,729-86,839 (-) | 0.354342131 | 0.409665529 | 0.2642 | 1 | GO:0005737 GO:0008553 GO:0015078 GO:0015986 GO:0015988 GO:0016469 GO:0046933 GO:0046961 TCDB:3.A.2.2.3 KOG:KOG1351 KEGGEC:ec:3.6.3.14 IPRF:ipr000194 IPRF:ipr000793 IPRF:ipr004100 IPRF:ipr005723 PFD:pf00006 PFD:pf00306 PFD:pf02874 |
| 87 | 828465 | scaffold_19:179,048-181,169 (+) | 1 | 0.251331833 | 0.01843 | 1 | GO:0000166 GO:0006754 GO:0008553 GO:0015078 GO:0015986 GO:0016021 GO:0016469 GO:0017111 GO:0046933 GO:0046961 TCDB:3.A.2.1.3 KOG:KOG1350 KEGGEC:ec:3.6.3.14 IPRF:ipr000194 IPRF:ipr000793 IPRF:ipr003593 IPRF:ipr004100 IPRF:ipr005722 PFD:pf00006 PFD:pf00306 PFD:pf02874 |
